# Supplementary material for: Impact-based flood forecasting in the Greater Horn of Africa
Source: Copernicus journal article supplement (doi:10.5194/egusphere-2023-804), 2023-05-02
Supplement: Supplementary file [file egusphere-2023-804-AC2-supplement.pdf]

MS No.: egusphere-2023-804

Title: Impact-based flood forecasting in the Greater Horn of Africa

Reviewer #2

General comments

This article presents the development and first evaluation of an impact-based medium-range flood forecasting system for the Greater Horn of Africa (GHA) called Flood-PROOFS East Africa (FPEA). The work presented is of great relevance for the readership of Natural Hazard and Earth System Sciences (NHES) and for the Special Issue. The authors developed FPEA, a valuable system for impact-based early warning and forecast-based action in eastern Africa, as proven by the fact that the system is already operational and supports the African Union Commission and the IGAD Disaster Operation Center in the early warning chain in Eastern Africa. The authors report a first evaluation of the hydrological reanalysis produced by FPEA and a semi-quantitative assessment of the impact forecasts for a recent flood event.

The paper is generally well written and builds on substantial high-quality work. However, some parts of the methods description and results discussion should be improved to make the paper even more impactful and suitable for publication in NHES. Some key methodological choices are given with no justification and should be further motivated and discussed. More insights on the consistency between reanalysis and forecast biases and climatology are needed to justify and discuss the approach of event detection followed by the authors. Moreover, the quantitative analysis of the model performance and the discussion could be enhanced, as a basic long-term evaluation is carried out only based on the KGE and its components for the simulation runs (with most emphasis on the correlation) to assess the capability of the system in flood event detection. Some more evaluation based on flood-relevant metrics could be made or at least the limitations of the current analysis should be discussed further, as the correlation over a multi-year simulation run does not seem sufficient to understand the capability of the system in detecting flood events. On the other hand, the event-based semi-quantitative analysis of the Nile floods of 2020 is very interesting and well presented. Hopefully future work will extend this analysis to more events and to impact-based quantitative evaluation, as the authors also suggest.

*Reply: We thank the reviewer for his/her positive criticism and for the constructive feedback. In the revised version we will work to address the main weaknesses and to clarify those parts of the text most in need, with additional text, analyses and figures if necessary. We do not disagree with any of the reviewer's comments so, the vast majority of those will result in an addition to the text, a clarification or a change. Our reply to each comment is shown below, interspersed with the reviewer's comments. We noted that a revised manuscript version is not yet required at this stage, hence to make replies clearer we include below portions of modified/updated sentences that will be used in the revised manuscript version.*

Specific comments

I have some moderate to major comments that the authors should consider to improve the manuscript:

Motivation of the choice of the model and forcing data: The choice of the hydrological model and hydro-meteorological forecasts and reanalysis data used in FPEA seem to be pre-determined for some unspecified reasons (e.g., not clear if based on known performance in the region or other reason). Given the plethora of hydrological models available, it would be important to discuss the

choice of the selected model (Continuum) for any possible region-specific or other criteria for model's choice (e.g., performance of different hydrological models). Similarly, the choice of the GFS forecast and GSMaP/ERA5 reanalysis is not motivated, while given the existence of alternative global datasets it would be important to explain why GFS, GSMaP and ERA5 have been used. Also, the choice of considering different reanalysis products (ERA5/GSMaP) for precipitation and temperature should be briefly discussed.

*Reply: We understand the reviewer's point that further clarifications and motivations must be included in the article to justify the use of the main tools and data. In the revised version we will work to include those details, so that all such choices are motivated and follow a coherent reasoning.*

*Regarding the hydrological model, we will clarify that Continuum has been developed at CIMA Foundation over the past 20 years and has already been implemented in several research applications and in operational forecasting chains. Having an in-house model, is very important for full system customization, and to learn from past experiences of implementation in different geographical configurations.*

*Regarding the use of GSMaP and ERA5, we will clarify that those datasets were chosen following a set of criteria driven by the operational nature of the system to build: 1) real-time production and release with minimal latency (a few hours at most); 2) availability of a historical dataset to maximize the coherence between the operational runs and the past data and related warning thresholds; 3) use of free products, to enable system continuity after the project completion; 4) data availability over the entire focus region with spatial and temporal resolution relevant for the desired application; 5) skillful performance in the simulation region.*

*Regarding the use of GFS and GEFS forecasts we will add that those products were chosen as they are freely available at the original resolution and with short latency for operational implementation, as well as the historical archive of past forecasts from 2015 onwards. This is important for simulating events occurred before the start of the operational forecasts, such as the Sudan floods case study in summer 2020. At the time of the start of the system implementation this was the main choice available with regard to operational weather forecasts. More recently, some global centers started to share a limited set of forecast products for non-commercial uses, hence we are considering if some of those can be added to turn the system into a multi-model approach. However, this needs to be considered carefully as some centers such as ECMWF (known for producing skillful forecasts) releases a spatially aggregated product (at 0.4° resolution) and with a delayed release schedule.*

Model calibration and regionalization procedures: some clarifications are needed: from the main manuscript it is not clear why for model calibration the normalized Root Mean Square Error (nRMSE) is used in place of the Kling Gupta Efficiency (KGE) or of other popular choices (e.g., NSE). Only in the Supplement Material, the authors explain that the nRMSE “enables a good trade-off in achieving low bias and good correlation”, but this needs to be recalled explicitly in the manuscript. Moreover, it is not clear whether previous studies in the literature show that the nRMSE enable a better trade-off in achieving low bias and good correlation than the KGE, or if the authors' choice is based on their trial-and-error calibration tests. Is the trade-off between correlation and bias better ensured by nRMSE? If there is no previous study on this, a brief highlight of these results might be shown in the manuscript. Moreover, only the supplement material states that the RMSE is normalized by the average flow obtained from long term records, while this needs to be specified in the main manuscript.

*Reply: We have performed a substantial amount of work to better understand the calibration process, including a global sensitivity analysis (GSA) on model parameters, and the choice of the perturbation method and of the objective function. This is not the central part of the article, but it is*

very important to maximize the performance of the hydrological model, given the data scarcity and quality to use. For this reason we opted for putting the extended material in the Supplement, while leaving a more concise version in the main body of the article. Upon the reviewer's comment we will add in the article the suggested clarifications taken from the supplement. In addition we will expand the text in the supplement material to add considerations on the choice of the objective function. Indeed, the KGE implicitly favor underestimations and smaller variability rates, while overestimation of these variables are much more penalized. Correlation is comparatively less penalized, given that the term  $(r-1)^2$  can't be larger than 4 (while the other 2 terms representing bias and variability are not bounded). The non-linear penalization of KGE is also seen by the small differences between a simulation corresponding to a constant zero line, leading to  $KGE=-0.44$  and a simulation with 2 components that are perfect (e.g., bias rate=1, correlation=1) and simulated variability which is twice the observed one, leading to  $KGE=0$ , which looks far from the optimum in terms of KGE, despite being a very valuable forecast. For this reasons the KGE can discern differences among very good datasets, but is of limited use for sub optimal data. This effect is even stronger in multi-site calibrations, where trade-offs must be accepted to find best configurations at the basin scale, yet not favoring specific locations as in cascading calibrations. In addition, we will clarify that parameter regionalization was performed on those domains with no calibration stations, according to criteria of proximity and climatic conditions, i.e., where parameter sets are taken from the closest calibrated donor domains with the same dominant Köppen-Geiger climate class taken from Beck et al. (2018).

The 3-year duration period for the calibration runs (4-year including warmup) is quite short compared to calibration periods commonly used in the literature and to the length of data available for this work (as 21 years are used for validation). It is unclear whether the authors tested the sensitivity of the results to the calibration period length. If not, this would be recommended, as the average performance of the long runs in both calibration and validation is very low (e.g., see median  $KGE\_val < -0.41$ ). Readers may wonder whether increasing or changing the calibration period could help improve model performance (in both calibration and validation), as a few previous studies suggest the importance of data length and inclusion of wetter years in the calibration (Anctil et al., 2004; Li et al., 2010). The authors should at least discuss further. In explaining the calibration procedure, the authors mention that the entire calibration process was repeated more than once to fine tune the choice of the parameter set, the calibration stations and the calibration period, but it is not clear how the different 2000 runs (see L. 235) and the whole process is setup (if with clear objective rules which should be specified).

*Reply: Model calibration is certainly a key component in the system, as it significantly contributes to the overall system performance. However it is not the key research question that this article aims to show. We found the best balance to provide the necessary information on calibration through the following scheme: 1) reference to a previously published paper by Alfieri et al (2022b) for details on the key methodological steps; 2) extensive information on all the steps that are specific of this work are listed in the dedicated section 2.4.2. Following the reviewers' comments we will further expand this section with regard to the choice of the objective function, of the multisite calibration, the duration of the calibration runs, and the regionalization. 3) More details on the large amount of work performed on specific aspects of the calibration are reported in Sections 1.1, 1.2 and 1.3 of the Supplement material. In the revised version we will further expand also the relevant part of the Supplement (Sect. 1.3), and will make clearer references to it in the main text.*

*We would like to add a few points which support the use of the proposed configuration:*

*- 3 years of available benchmark data (plus one initial year for model warm up) is also justified by the need of multi-site calibrations for all stations at the same time. Here we had serious issues of data availability, with continuous observed discharge time series rarely exceeding 3-4 years (still with some data gaps that we had to accept if we wanted to calibrate at all).*

- The model runs at hourly resolution, hence 4 year runs are already a huge computational effort on such scale. When publishing a pure research-oriented work, one has usually more flexibility on the case study and on the available data. Here we had to implement a system on fixed domains, with severe issues on the availability and quality of the available data.

- A further point supporting the sufficient duration of the model runs is that best performances are obtained downstream in the largest rivers, where the hydrological memory is the longest due to large reservoirs upstream and long travel times of the flows. Conversely we have shown that worst performance are mostly located in stations immediately downstream large reservoirs, for which the release rules are not easily predictable, as well as in small headwater catchments, related to data quality issues, the smaller weights received in the calibration, and the simplifications introduced by relatively coarse gridded input data.

For the regionalization, the adopted criteria of proximity and climatic conditions should be further specified, or a reference should be added.

*Reply: We will clarify that parameter regionalization was performed on those domains with no calibration stations, according to criteria of proximity and climatic conditions, i.e., where parameter sets are taken from the closest calibrated donor domains with the same dominant Köppen-Geiger climate class taken from Beck et al. (2018).*

Flood event detection and ensemble forecast trigger: The adopted methods for event detection and ensemble triggering rely on the consistency of climatologies of forecasts (driven by GFS and GEFS) and of long-term runs driven by the reanalysis (GSMaP and ERA5). If the climatology biases and relative ranking of flood peaks are different across forecasts and reanalysis the triggers might be less (or not) effective. Lead-time dependent biases in the forecasts are often found in hydro-meteorological forecasts and their consideration has proved important in the literature (Zsoter et al., 2020). A comparative analysis of the climatology of forecasts and long runs from the reanalysis would support the key operational choices adopted for FPEA. Further analysis or at least more discussion on this point would be important.

*Reply: Upon the reviewer's comment we will include a dedicated paragraph on the use of constant thresholds in a system using different datasets for forecasting extremes, in comparison to those used to derive the thresholds. In particular, we will clarify in Sect. 2.5.1 that potential differences in the statistics of extreme precipitation inducing high flow events may arise by the use of different datasets for the forecast and the historical runs (hence the warning thresholds). However, recent research showed that constant thresholds can be safely used for a 5-day forecast range as in the system shown here (Zsoter et al., 2020; Alfieri et al., 2019).*

Basic model evaluation and missing quantitative forecast evaluation: the quantitative evaluation of FPEA is carried out and presented in Section 3.1 (Hydrological model evaluation) only for the simulations in validation mode with few basic general metrics. I wonder whether the authors could include some results of forecast evaluation too, even if on a shorter period based on the hindcasts available, as this would be very relevant. Regarding the metrics, the use of only the KGE and its components for assessing the simulation may limit the understanding of flood simulation capabilities. The authors claim (L. 329-330) that the correlation is a 'suitable indicator for the capability in event detection and in turn of flood early warning based on threshold exceedance'. I agree that the correlation is useful to give insights on this capability (more than the bias, of course), but it is not the most suitable indicator for flood event detection. Other metrics (e.g., flood-event based metrics, peak errors, Hit Rates and False Alarms, the Brier score, etc.) might be more suitable. The authors could extend their quantitative model evaluation to other metrics more targeting flood detection capabilities or should at least further discuss the limitations of the current analysis based on the simple correlation.

*Reply: We will expand the comment related to the use of correlation as a suitable indicator for event detection, and add 1 or 2 supporting references. This article is focused on the presentation of a system which has a number of novelties compared to most existing systems, particularly the quantitative impact-based forecasting part. We do not aim to provide a full evaluation of all system components at this stage, though we acknowledge it would add relevance. Work is ongoing and we plan to improve step by step the system capabilities. Model evaluation is definitely one of the areas where we will keep working, not only to improve the trust of the users, but especially for us developers to identify areas of improvement, which involve not only the pure hydrological modeling but also the inundation mapping and especially the impact assessment. These considerations will also be better reflected in the Conclusion section.*

Discussion on modelling assumptions and limitations: It would be important to enhance the discussion on the impact of the assumption of no flood defenses (or failure) on the possible overestimation of flood impacts. Similarly, the choice of including only the largest reservoirs of the region (storage > 300 Mm<sup>3</sup>) and possible assumptions behind their management rules made in the model should be discussed further. In the Section describing the model setup (2.4.1), the modelling of reservoirs and lakes is not even briefly explained and no reference on how they are modelled in Continuum seems to be provided, while it would be important to understand how human influences and dams are considered.

*Reply: We acknowledge that the current text may incorrectly suggest that we assume no flood defenses, hence for such reason it is prone to overestimate impacts. This is not true, hence we will clarify in Sect. 2.2.2 that vulnerability values used in the impact estimation depend on the hazard magnitude, to model the effect of defenses and other flood mitigation measures. In other words, the hazard layer provides information on potentially affected areas assuming no flood defenses, while its combination with the vulnerability layer progressively reduces the impacts for low-magnitude events. Such an approach has been used in several previous research and operational works such as in Dottori et al., (2018, <https://doi.org/10.1038/s41558-018-0257-z>) and in Ward et al., (2017, <https://doi.org/10.1038/nclimate3350>).*

*Regarding the implementation of dams and lakes, we will clarify that we added the largest ones because they have the largest influence on downstream flow patterns. Adding smaller ones is first of all increasingly difficult, due to the lower availability of the data needed by the model for implementation; second, it adds complexity to the model, yet with no assurance of model improvement, particularly regarding reservoir rules which are not known. Another key reason for adding only the largest lakes is the possibility to assimilate their observed water levels through remote sensing. In this regard, we will add in the conclusions that another foreseen area of research is the improvement of water levels simulated in large lakes and reservoirs through the assimilation of satellite altimetry. Knowing precisely those variables is of crucial importance to correctly simulate the chances of flooding downstream due to a combination of high lake levels and severe precipitation in the upstream portion of the river basin.*

Other minor comments:

A few more references in the introduction are needed to back up some statements on the projected increase in variability of rainfall and higher risk of flooding (e.g., see sentence: “The variability in the seasonal rainfalls is projected to increase, resulting in more frequent wetter and drier years and a higher risk of flood and drought events.”)

*Reply: Such sentence is related to the work by Richardson et al. (2022), cited in the previous sentence. Furthermore, in the revised version we will add reference to the work by Haile et al.,*

(2020, <https://doi.org/10.1029/2020EF001502>) and by Finney et al., (2020, <https://doi.org/10.1002/qj.3698>) who also support those findings.

When mentioning where (in which other Countries, e.g. Italy, Bolivia, Mozambique, etc.) the system is operational (L. 82-83), it would be interesting to see any references if available.

*Reply: Previous systems mentioned in the paper were described in internal project documents which cannot be shared publicly. We decided to publish for the first time the impact-based version of the FloodPROOFS chain in this occasion because of the significant advances in the modeling chain and because of the large simulation area, which increase its overall impact and interest on the readership. However, in the revised version, we will add the reference to an article describing an early version of the FloodPROOFS implementations over the Valle d'Aosta region in Italy by Laiolo et al. (2013, <https://doi.org/10.1002/hyp.9888>).*

Moreover, it is not clear if the configuration of the system would be different in each Country and if new impact-based components have been included for the first time East Africa (see L.84-87).

*Reply: It is indeed the first time where FloodPROOFS (and consequently a scientific publication describing it) includes the full modeling chain from meteorological variables down to impact forecasts. This will be added in the revised article version.*

The impact forecast methodology needs to be further clarified. In Section 2.5.2, it is not completely clear how multiple flood threshold-based inundation maps are combine (e.g. L. 277-280: “In addition to the three warning thresholds used for early warning (i.e., annual frequencies of 1 in 2, 5 and 20 years), we extracted four additional threshold maps with the same annual frequencies as those of the JRC inundation maps (i.e., 1 in 50, 100, 200 and 500 years), to enable impact assessments for a wider spectrum of event magnitude”). Are the static inundation maps corresponding to the six return periods just overlapped when activated by the dynamic forecasts (with no interpolation)?

*Reply: Upon the reviewer’s comment, this part will be expanded to clarify the procedure. The revised text will state “In addition to the three threshold maps of peak discharges used for hazard classification (i.e., with annual frequencies of 1 in 2, 5 and 20 years), we extracted four additional threshold maps with the same annual frequencies as those of the JRC inundation maps (i.e., 1 in 50, 100, 200 and 500 years), to enable flood delineation and impact assessments for a wider spectrum of event magnitudes. In other words, extreme events in the order of e.g., 1 in 100 years will be assigned to the highest hazard level (i.e., the 1 in 20 year flood magnitude) while its inundation and resulting impacts will be assessed on the basis of the closest flood magnitude (i.e., the 1 in 100 year in this case).”. Indeed there is no spatial interpolation of the six maps, also because of the small sensitivity of inundation extent versus the return period. This is because these represent unprotected inundation scenarios, while the effect of flood protections is then accounted for in the vulnerability layer.*

In Section 2.1 (The study region), it would be important to mention which other operational flood forecasting systems may already exist in the GHA region at the Country or regional levels, and how the model developed here fills specific gaps.

*Reply: Upon the reviewer’s comment we will add in Sect 2.1 the findings of our survey on operational systems in the GHA region. In November 2021, CIMA Foundation and ICPAC organized a technical training and consultation with representatives of national hydro-meteorological services of the GHA region, focusing on, among the various objectives, gathering details on the current flood risk management approaches. It emerged a substantial lack of flood*

*forecasting systems in operation at the country level, with the only hydrological forecast information available coming from global systems such as GloFAS (<https://www.globalfloods.eu/>), thus reinforcing the need for a tailored system for the region.*

L. 315-320: The discussion of the bias of the simulations and differences with previous studies (underestimation vs overestimation) should be improved specifying that different reanalysis products can lead to different biases but results generally vary across catchments (even in a same region as eastern Africa) and a few more citations could be added for this. For example, the following sentence can be improved: “The issue of bias in hydrological simulations in Africa was already pointed out in various previous works, yet with a trend of overestimating discharges when atmospheric reanalyses are used as input.”. The bias trends are expected to depend on the reanalysis products, the basins and models used, as few previous studies showed (Cantoni et al., 2022; Wanzala et al., 2022) and the picture over Africa is expected to be quite complex.

*Reply: We thank the reviewer for pointing us to these two references which support the discussion with additional findings on the topic of bias in hydrological modeling in Africa. As suggested, in the revised version we will add that other variables are known to influence patterns of bias in hydrological modeling, including the precipitation dataset, the hydrological model, as well as specific basin characteristics including its climate, vegetation and soil (see e.g., Cantoni et al., 2022; Wanzala et al., 2022).*

L. 320-322: After this sentence, it would be good to include a citation to previous work: “it is known that bias does not deteriorate the performance of systems based on threshold exceedance detection, if warning thresholds are consistent with the discharge time series.”

*Reply: Here we will add a citation to Alfieri et al., (2013), which is already in the reference list, but also helps on this occasion by supporting the statement above.*

#### Technical corrections

L. 139-L. 144: it would be useful to add a link to the mentioned JRC Data Catalog Service webpage and to the source of the Areas of Influence maps

*Reply: We will include all the available sources in the Data Availability section, shown at the end of the article, as per journal policy.*

L.146-149: it would be important to report the sources of the exposure layers in the main manuscript (also for reproducibility and better understanding of what information has been used), while it is OK keeping additional details in the Supplement material.

*Reply: Given the lengthy description of these sources we will add information on these sources in the Data availability section, keeping their full description in the Supplement material.*

L. 160-161: sentence to improve and clarify: “In this work we use vulnerability information from Alfieri et al. (2022a) which values range between 0 and 1 depending on the hazard magnitude...” (check the word ‘which’)

*Reply: In this sentence, ‘which’ is a relative pronoun, meaning ‘where those values’. It seems grammatically correct. Anyways, full proofreading will be performed before publication.*

L. 179: the “respective domain resolutions” (i.e. their range) could be specified here, even if later in the manuscript the model resolutions are mentioned.

*Reply: Domain resolution will be briefly anticipated here, with reference to Sect. 2.4.1 for the full details.*

L. 191: Silvestro et al. (2013) is missing in the full reference list.

*Reply: We thank the reviewer for spotting it. The reference to Silvestro et al. (2013) will be added in the reference list.*

L. 200: it would be interesting to know how the variable grid resolution is fixed for each domain used (is there an objective rule followed to fix it?)

*Reply: We will clarify that the model setup has variable grid resolution which depend on the domain size, so that the run time and the computing resources needed by the hydrological simulations are comparable across the domains.*

L. 191-211: the model temporal resolution should be specified in this Section.

*Reply: temporal resolution (i.e., 1 hour) will be added in this section as suggested and briefly recalled in Sect. 2.5.1*

L. 237-242: the form of the sentences reporting the three different key functions of the long-term model simulations should be improved (either as full sentences as the third point, or as a list but using appropriate punctuation).

*Reply: This part will be made clearer by reshaping it into a bullet-point list.*

L. 269: this and other references to the Supplement material need to be clarified, by adding section title and/or Figure numbers to refer to the exact part of the Supplement Material

*Reply: In the revised version we will be more specific whenever citing content of the Supplement. In the example raised by the reviewer it will be changed to “see example in the Supplement material, Figure S6”.*

L. 276-277: regarding mapping each pixel of the GloFAS river network to one or more pixels of the Continuum network, the sentence mentioning “automated criteria of proximity and similarity between the drainage areas, followed by manual fitness check” could be clarified reporting more yet brief details on the automated criteria and manual check.

*Reply: We will clarify that each pixel of the GloFAS river network was mapped to one or more pixels of the Continuum network, using an automated approach starting from the same location and progressively moving to the surrounding square of grid points until the differences in the drainage areas are below 10%. The automated procedure is then followed by a manual fitness check, particularly useful at the confluences.*

Equations (1) and (2): units should be reported in the lines below explaining all terms

*Reply: Units will be included for all terms of the equations. In particular, these are all dimensionless, except for the Exposure layers, and the resulting impacts, which have the same units as the exposure classes.*

L. 296: a link and reference to the ‘myDewetra web interface’ mentioned here for the first time should be reported (maybe introducing briefly what it is)

*Reply: We will clarify that results of flood impacts are displayed in the myDewetra geospatial visualization web platform (<https://www.mydewetra.world/>), developed by CIMA Foundation to support forecasters and decision makers in hazard monitoring, early warning as well as during emergencies.*

L. 304 and Fig 2 caption: bias ratio and variability ratio

*Reply: both versions “rate” and “ratio” are accepted in the literature. In this paper we have adopted the form with “rate” and used it consistently throughout the document.*



L. 325-326: sentence to correct: “stations immediately downstream large reservoirs (i.e. Victoria Nile downstream ...), which release rules are not easily predictable” – (maybe use ‘for which ...’ instead)

*Reply: The sentence will be improved following the reviewer’s suggestion.*

L. 372: check and clarify this sentence as it does not sound clear (“... with a slight but persistent increasing trend resulting from the lamination of flood volumes released by the Sudd Swamps in South Sudan”)

*Reply: Here, we will improve the sentence, clarifying that the persistent increasing trend results from high flows upstream which are laminated by the Sudd Swamps in South Sudan and slowly released downstream to Sudan (Figure 4a).*

Figure 4a: it would be good to improve the quality and clarity of the hydrographs (resolution of screenshots)

*Reply: We acknowledge that hydrographs in the figure cannot be read in all details. However, the aim here is to give a visual demonstration of sample products as they can be visualized in the myDewetra web interface, without tailored alterations. Unfortunately, the font size in those graphs cannot be customized in the web platform. Given the impact-based orientation of the forecast system, we would like to stress more those products that can be validated, such as the forecasts of impacts, as done in Figure 7 and Table 1.*

Figure 5: caption and figure titles are not consistent (forecasts of affected cropland aggregated vs. population affected)

*Reply: We thank the reviewer for spotting the mistake. Figure 5 shows population affected. It will be corrected in the revised version.*

Table 1: not clear why the comparison with GloFAS is only carried out for population affected here and not the rest

*Reply: Here the comparison was performed only for the categories where we found reported data. Hence it would be possible to compare the estimates of cropland affected (the only other category provided by both FPEA and by GloFAS), but we could not find official benchmark data to validate.*

L. 430-436: this part of the conclusions could be moved to the introduction or reduced a bit here, while readers would expect a brief summary and highlights of the results presented in the paper in terms of model evaluation

*Reply: This part will be a bit reduced, as suggested.*

L. 457-459: check and improve the sentence “forecasts of inundation extent can be benchmarked to satellite acquisitions, which improved latency and availability currently enable almost daily coverage of flood disasters” (maybe better: “which currently enable ... thanks to improved latency...”)

*Reply: We thank the reviewer for the comment. Here we meant to use the pronoun “whose” instead of “which”. The sentence will be improved accordingly.*

## References

Anctil, F., Perrin, C., & Andréassian, V. (2004). Impact of the length of observed records on the performance of ANN and of conceptual parsimonious rainfall-runoff forecasting models. *Environmental Modelling & Software*, 19(4), 357–368. [https://doi.org/10.1016/S1364-8152\(03\)00135-X](https://doi.org/10.1016/S1364-8152(03)00135-X)

Cantoni, E., Trambly, Y., Grimaldi, S., Salamon, P., Dakhlaoui, H., Dezetter, A., & Thiemig, V. (2022). Hydrological performance of the ERA5 reanalysis for flood modeling in Tunisia with the LISFLOOD and GR4J models. *Journal of Hydrology: Regional Studies*, 42, 101169. <https://doi.org/10.1016/j.ejrh.2022.101169>

Li, C., Wang, H., Liu, J., Yan, D., Yu, F., & Zhang, L. (2010). Effect of calibration data series length on performance and optimal parameters of hydrological model. *Water Science and Engineering*, 3(4), 378–393. <https://doi.org/10.3882/j.issn.1674-2370.2010.04.002>

Wanzala, M. A., Ficchi, A., Cloke, H. L., Stephens, E. M., Badjana, H. M., & Lavers, D. A. (2022). Assessment of global reanalysis precipitation for hydrological modelling in data-scarce regions: A case study of Kenya. *Journal of Hydrology: Regional Studies*, 41, 101105. <https://doi.org/10.1016/j.ejrh.2022.101105>

Zsoter, E., Prudhomme, C., Stephens, E., Pappenberger, F., & Cloke, H. (2020). Using ensemble reforecasts to generate flood thresholds for improved global flood forecasting. *Journal of Flood Risk Management*, 13(4), e12658. <https://doi.org/10.1111/jfr3.12658>
